# Supplementary material for: Antiparallel alignment of the two angular momenta in a photoexcited dysprosium–phthalocyanine complex
Source: Royal Society of Chemistry journal article supplement (doi:10.1039/d2qi01925f), 2022-12-03
Supplement: d2qi01925f1.pdf [file d2qi01925f1.pdf]

## Electronic Supplementary Information

### Antiparallel Alignment of the Two Angular Momenta in a Photoexcited Dysprosium-Phthalocyanine complex.

*Kazuro Kizaki,<sup>a</sup> Anas Santria<sup>\*a,b</sup> and Naoto Ishikawa<sup>\*a</sup>*

<sup>a</sup>Department of Chemistry, Graduate School of Science, Osaka University, 1-1 Machikaneyama-cho, Toyonaka, Osaka 560-0043, Japan

<sup>b</sup>Research Center for Chemistry, National Research and Innovation Agency, Kawasan PUSPITEK, Serpong, Tangerang Selatan, Banten, 15310, Indonesia

Keywords: Intramolecular magnetic interaction, Anti-ferromagnetism, Magnetic circular dichroism, Excited state, Dysprosium phthalocyanine.

\*Email: [iskw@chem.sci.osaka-u.ac.jp](mailto:iskw@chem.sci.osaka-u.ac.jp) (N.I.), [asantria@chem.sci.osaka-u.ac.jp](mailto:asantria@chem.sci.osaka-u.ac.jp) (AS), [anas.santria@brin.go.id](mailto:anas.santria@brin.go.id) (AS)

- Figure S1.** Absorption and MCD spectra of [DyPc(cyclen)]Cl doped in a PMMA film measured at 1.5 K under a magnetic field of 1 T
- Figure S2.** Band deconvolution of absorption and MCD spectra of [DyPc(cyclen)]Cl doped in a PMMA film measured at 100 K under a magnetic field of 1 T
- Figure S3.** Band deconvolution of absorption and MCD spectra of [DyPc(cyclen)]Cl doped in a PMMA film measured at 1.5 K under a magnetic field of 1 T
- Figure S4.** Contour maps of the ratio RMS1/RMS0 of simulation 1 (a,  $J_z = 11/2$ ) and simulation 2 (b,  $J_z = 13/2$ )
- Figure S5.** Molecular orbital of [DyPc(cyclen)]<sup>+</sup> obtained from RASSCF(9,7) calculations with 9 configurations of *A* symmetry
- Figure S6.** Molecular orbital of [DyPc(cyclen)]<sup>+</sup> obtained from RASSCF(9,7) calculations with 12 configurations of *B* symmetry
- Figure S7.** Orbital shapes for the doublet 2 of [DyPc(cyclen)]<sup>+</sup> under *C*<sub>2</sub> symmetry with basis set 1
- Figure S8.** Orbital shapes for the doublet 3 of [DyPc(cyclen)]<sup>+</sup> under *C*<sub>2</sub> symmetry with basis set 1
- Figure S9.** Orbital shapes for the doublet 4 of [DyPc(cyclen)]<sup>+</sup> under *C*<sub>2</sub> symmetry with basis set 1
- Figure S10.** Orbital shapes for the doublet 8 of [DyPc(cyclen)]<sup>+</sup> under *C*<sub>2</sub> symmetry

- with basis set 1
- Figure S11.** Orbital shapes for the doublet 163 of [DyPc(cyclen)]<sup>+</sup> under  $C_2$  symmetry with basis set 1
- Figure S12.** Orbital shapes for the doublet 164 of [DyPc(cyclen)]<sup>+</sup> under  $C_2$  symmetry with basis set 1
- Figure S13.** Orbital shapes for the doublet 165 of [DyPc(cyclen)]<sup>+</sup> under  $C_2$  symmetry with basis set 1
- Figure S14.** Orbital shapes for the doublet 166 of [DyPc(cyclen)]<sup>+</sup> under  $C_2$  symmetry with basis set 1
- Figure S15.** Orbital shapes for the doublet 167 of [DyPc(cyclen)]<sup>+</sup> under  $C_2$  symmetry with basis set 1
- Figure S16.** Orbital shapes for the doublet 168 of [DyPc(cyclen)]<sup>+</sup> under  $C_2$  symmetry with basis set 1
- Figure S17.** Orbital shapes for the doublet 169 of [DyPc(cyclen)]<sup>+</sup> under  $C_2$  symmetry with basis set 1
- Figure S18.** Orbital shapes for the doublet 170 of [DyPc(cyclen)]<sup>+</sup> under  $C_2$  symmetry with basis set 1
- Figure S19.** Orbital shapes for the doublet 171 of [DyPc(cyclen)]<sup>+</sup> under  $C_2$  symmetry with basis set 1
- Figure S20.** Orbital shapes for the doublet 172 of [DyPc(cyclen)]<sup>+</sup> under  $C_2$  symmetry with basis set 1
- Table S1.** Parameters determined by the band deconvolution of absorption and MCD spectra of [DyPc(cyclen)]Cl doped in a PMMA film
- Table S2.** Selected dipole transition strengths for [DyPc(cyclen)]<sup>+</sup> as extracted from RASSCF/RASSI/SINGLE\_ANISO calculations , RAS(1,7,2)
- Table S3.** The calculated transition energy, orbital and spin angular momenta of the ground doublet and the excited doublet SO states for [DyPc(cyclen)]<sup>+</sup>, generated from RAS(1,7,2) calculation with basis set 2

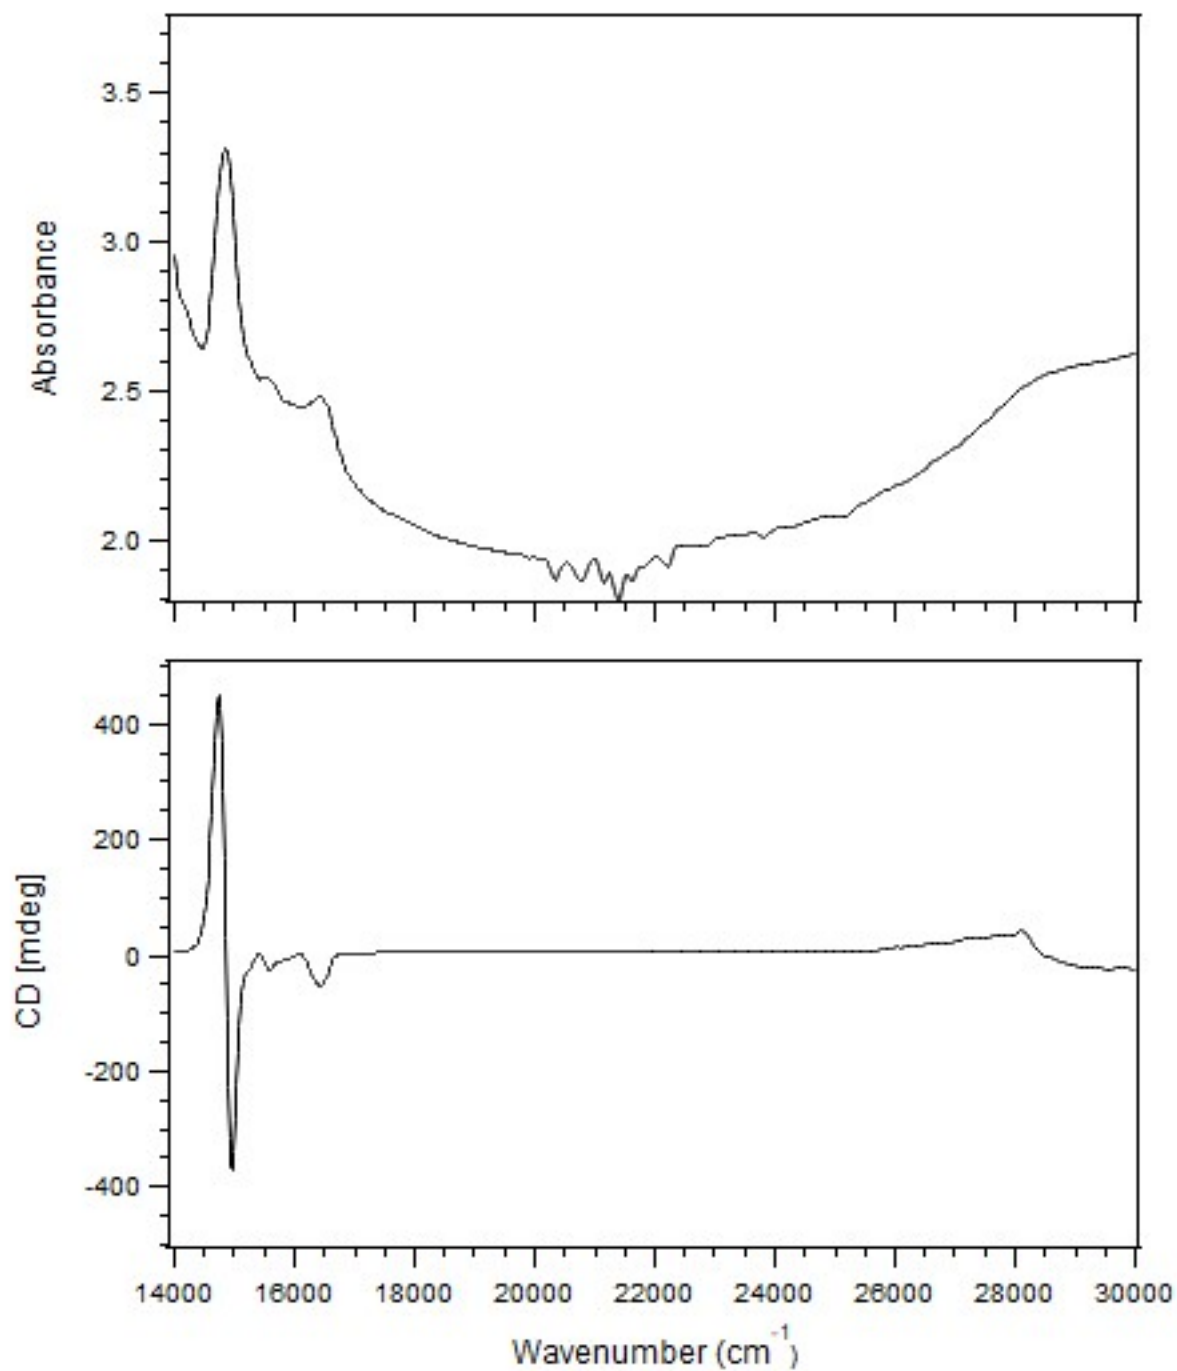

**Figure S1.** Absorption (top) and MCD (bottom) spectra of [DyPc(cyclen)]Cl doped in a PMMA film measured at 1.5 K under a magnetic field of 1 T.

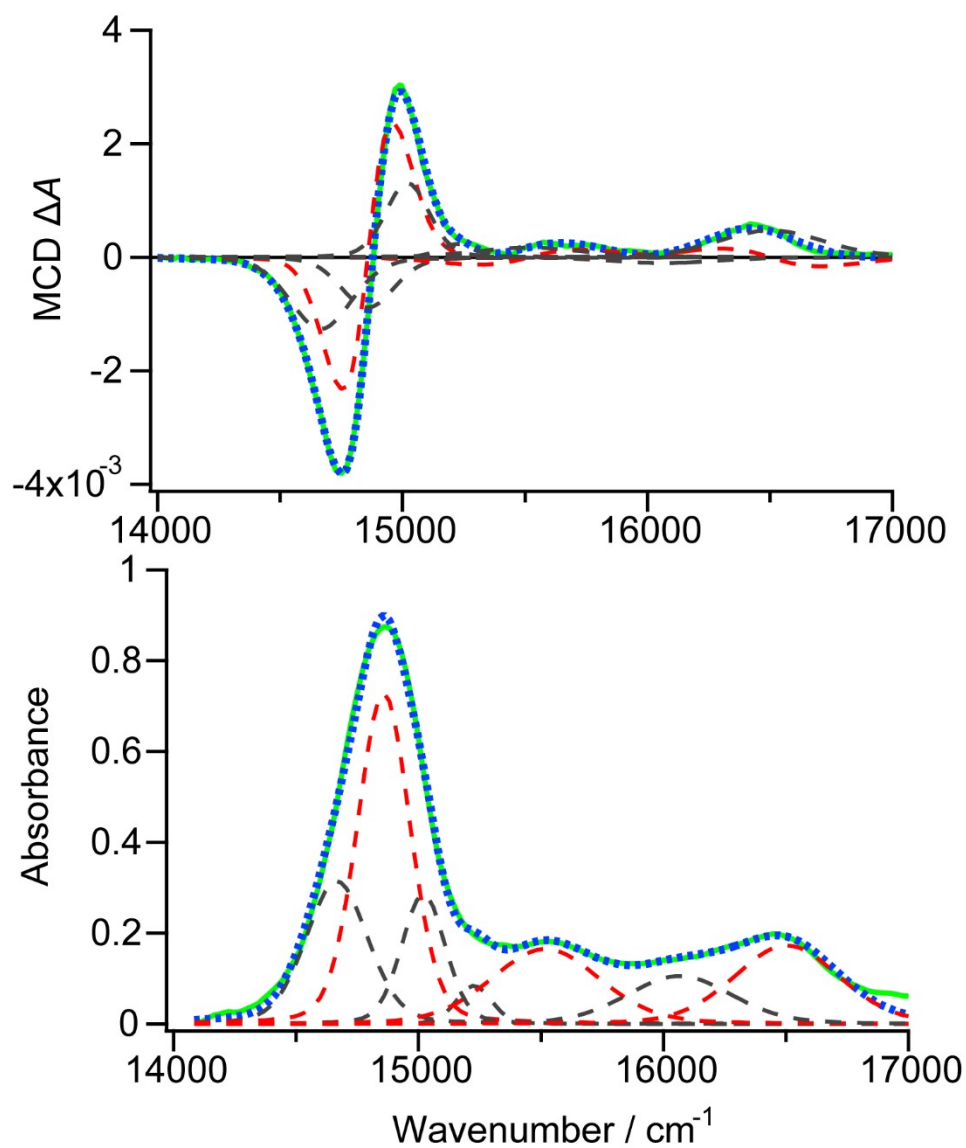

**Figure S2.** Result of band deconvolution of absorption (top) and MCD (bottom) spectra of [DyPc(cyclen)]Cl doped in a PMMA film measured at 100 K under a magnetic field of 1 T. Observed spectra are shown in solid line (green). *A*-term components are shown in thick broken line (red) and *B*-term components in thick broken line (black). The sum of these components is shown in dotted line (blue). All spectra have been scaled so that the absorbance at the maxima of the Q band is set to 1.

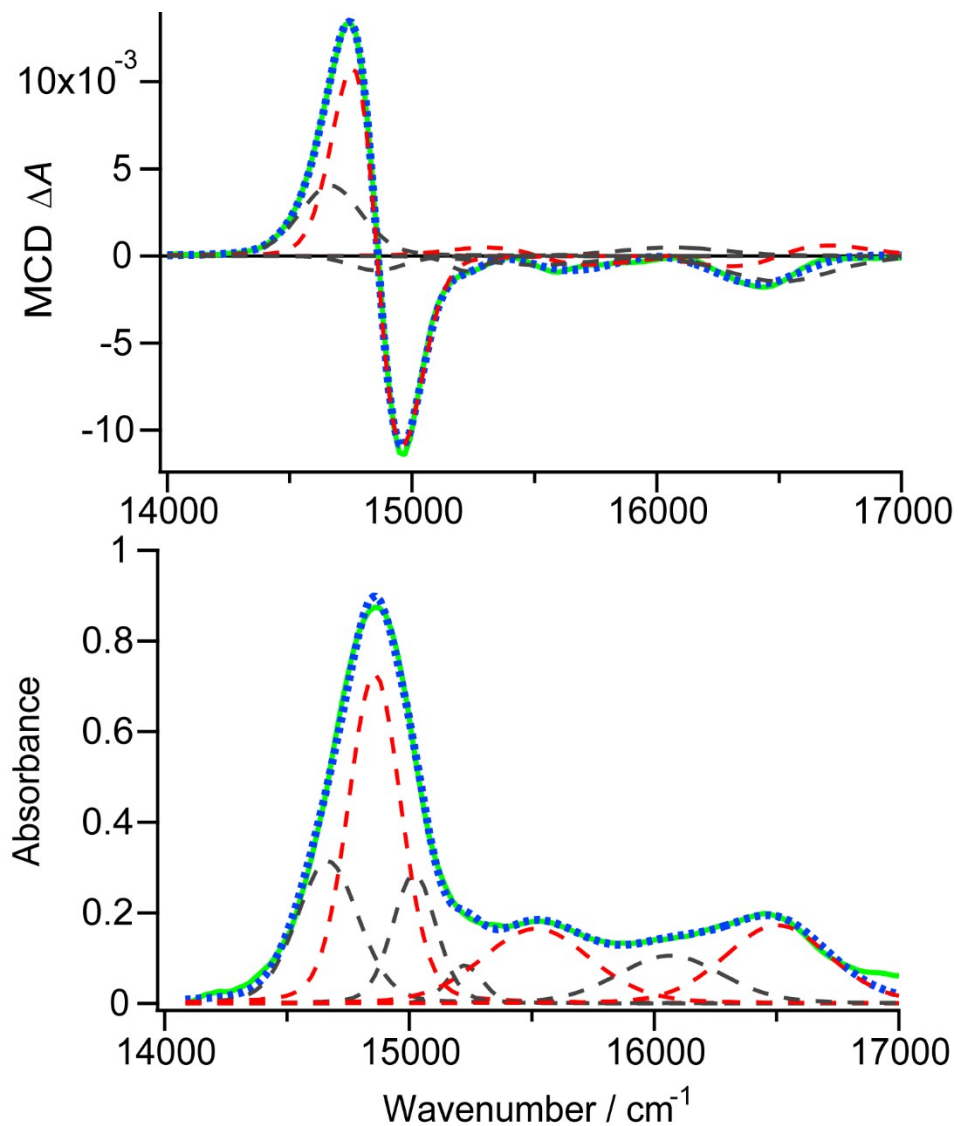

**Figure S3.** Result of band deconvolution of absorption (top) and MCD (bottom) spectra of [DyPc(cyclen)]Cl doped in a PMMA film measured at 1.5 K under a magnetic field of 1 T. Observed spectra are shown in solid line (green). *A*-term components are shown in thick broken line (red) and *B*-term components in thick broken line (black). The sum of these components is shown in dotted line (blue). All spectra have been scaled so that the absorbance at the maxima of the Q band is set to 1.

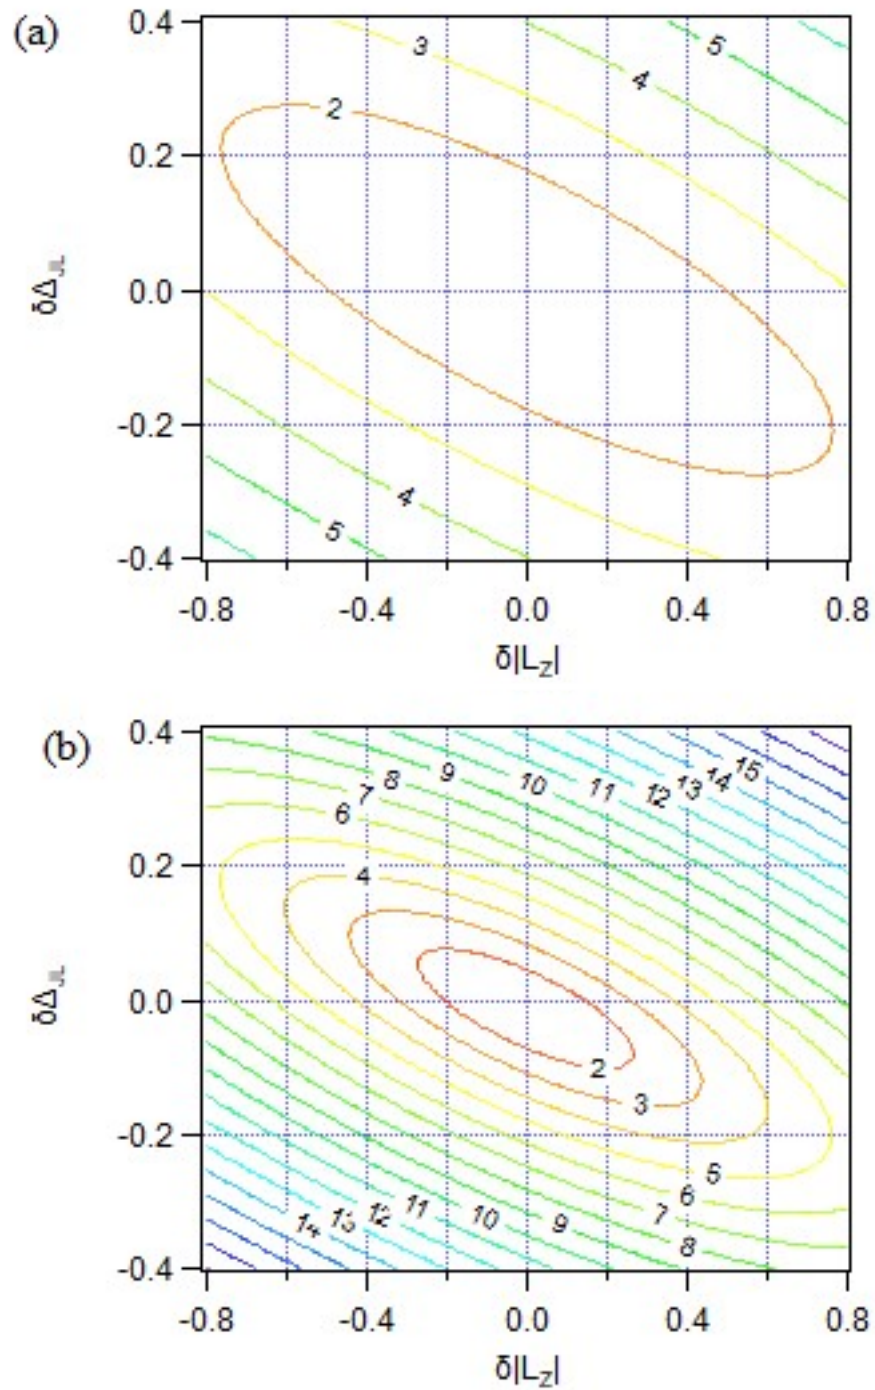

**Figure S4.** Contour maps of the ratio  $\text{RMS1}/\text{RMS0}$  of simulation 1 (a,  $J_z = 11/2$ ) and simulation 2 (b,  $J_z = 13/2$ ), where  $\text{RMS0}$  is the minimum RMS error obtained with the two parameters ( $|L_z|$  and  $\Delta_{JL}$ ) determined by means of least-square procedure, and  $\text{RMS1}$  is the RMS error obtained varying two parameters if the two by the values indicated in the vertical and horizontal axes.

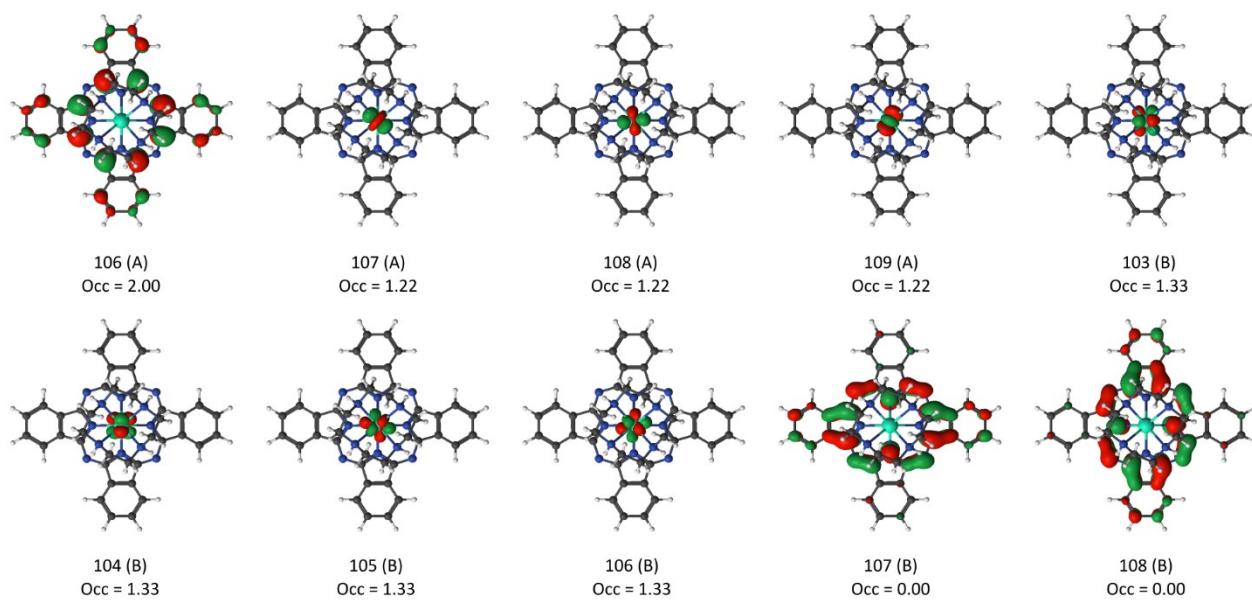

**Figure S5.** Molecular orbital of  $[\text{DyPc}(\text{cyclen})]^+$  obtained from RASSCF(9,7) calculations with 9 configurations of *A* symmetry.

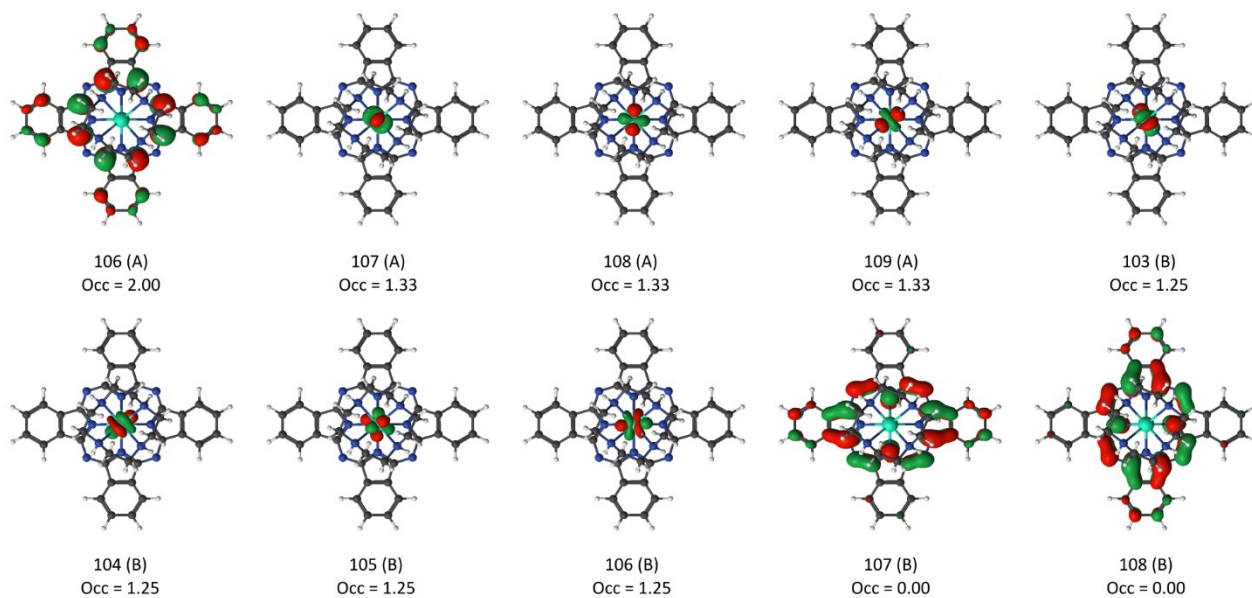

**Figure S6.** Molecular orbital of  $[\text{DyPc}(\text{cyclen})]^+$  obtained from RASSCF(9,7) calculations with 12 configurations of *B* symmetry.

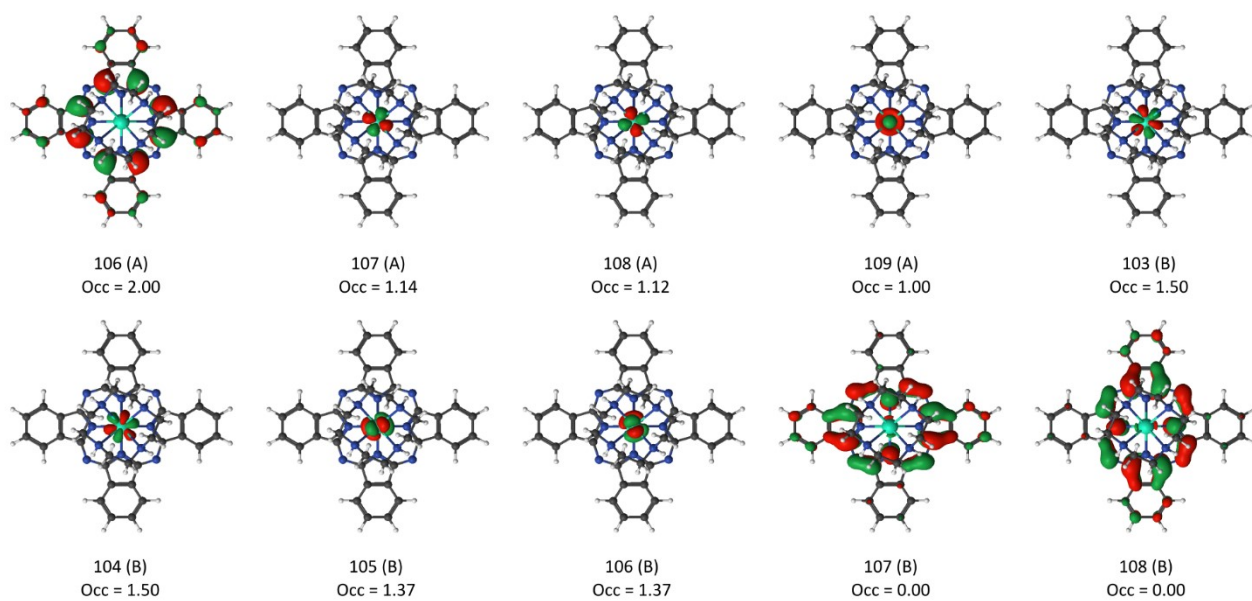

**Figure S7.** Orbital shapes for the doublet 2 of  $[\text{DyPc}(\text{cyclen})]^+$  under  $C_2$  symmetry with basis set 1.

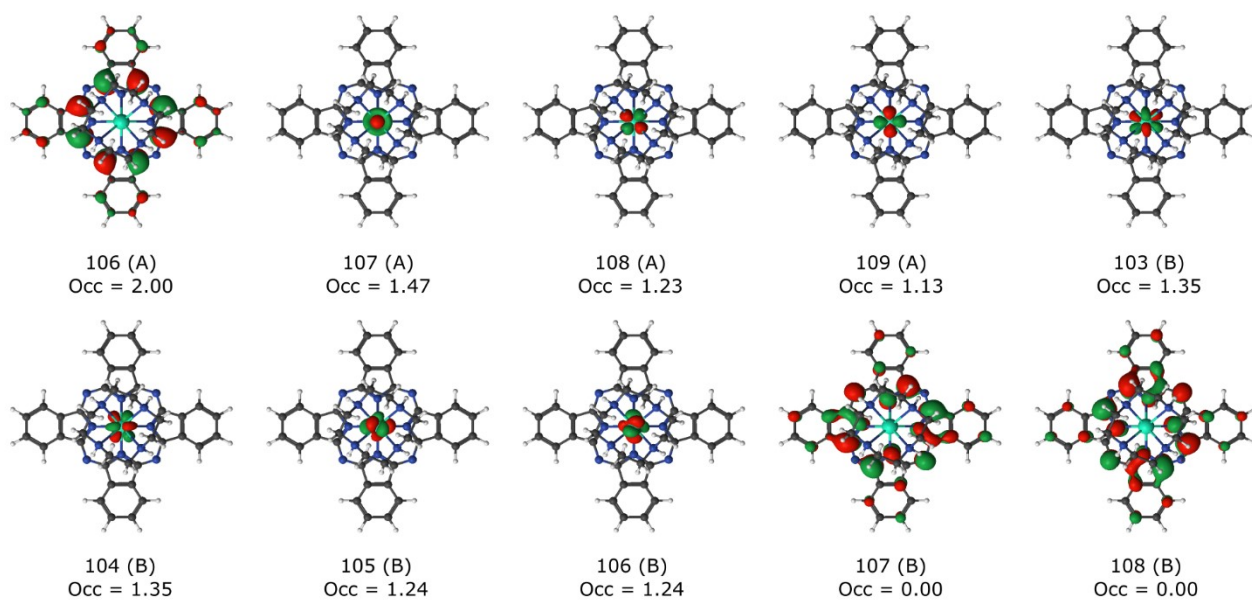

**Figure S8.** Orbital shapes for the doublet 3 of  $[\text{DyPc}(\text{cyclen})]^+$  under  $C_2$  symmetry with basis set 1.



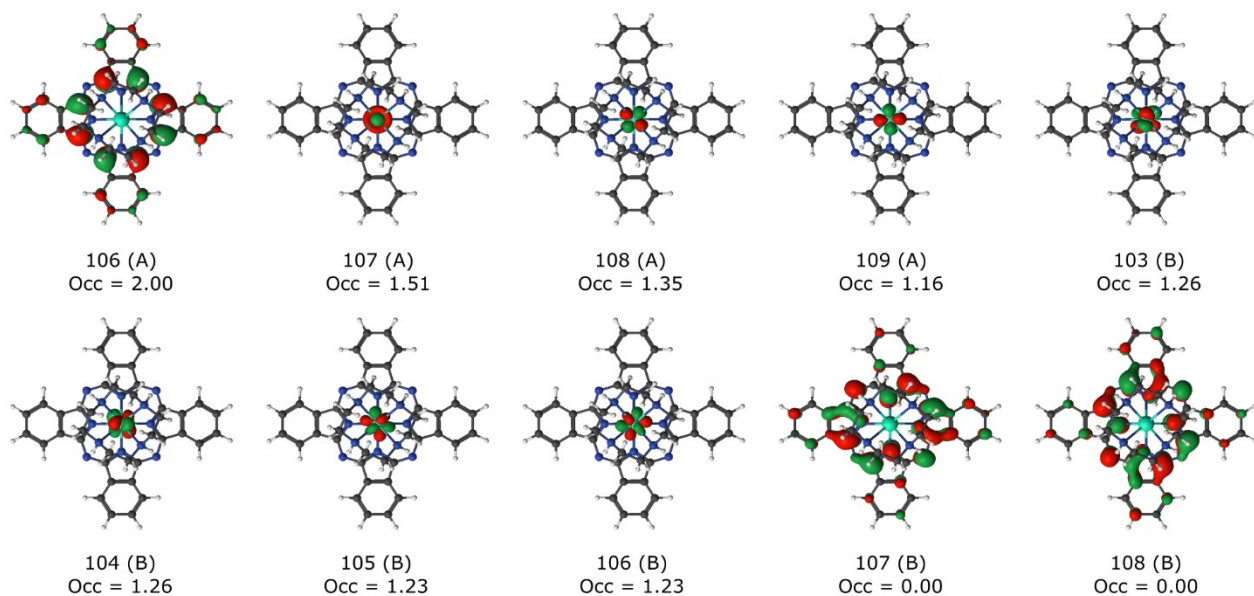

**Figure S9.** Orbital shapes for the doublet 4 of  $[\text{DyPc}(\text{cyclen})]^+$  under  $C_2$  symmetry with basis set 1.

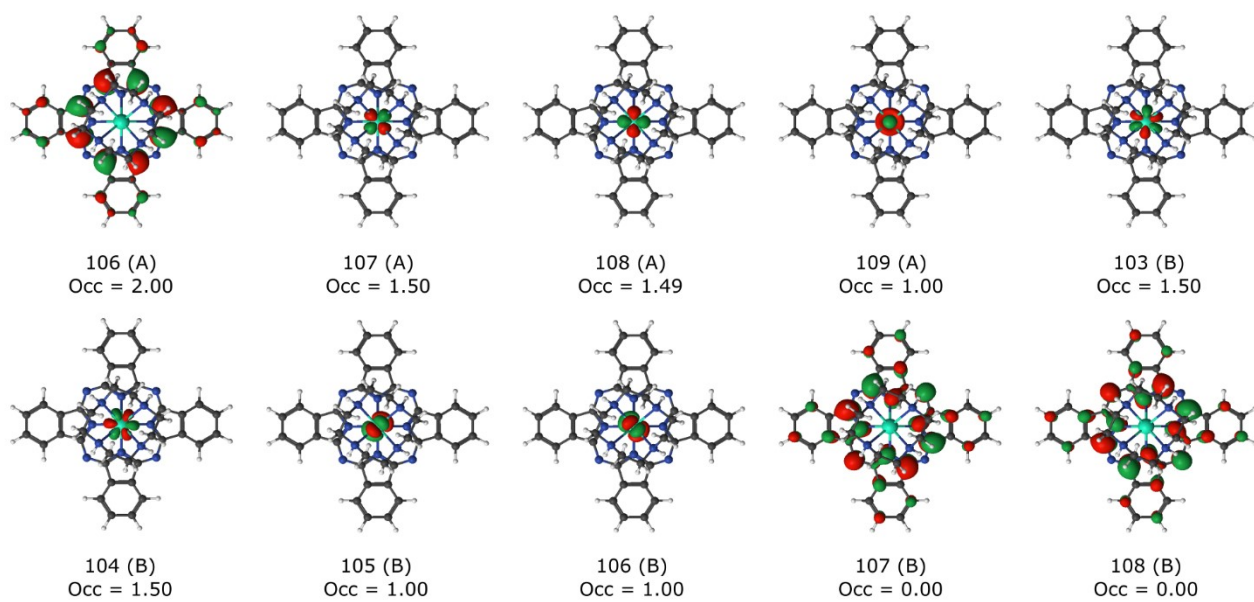

**Figure S10.** Orbital shapes for the doublet 8 of  $[\text{DyPc}(\text{cyclen})]^+$  under  $C_2$  symmetry with basis set 1.

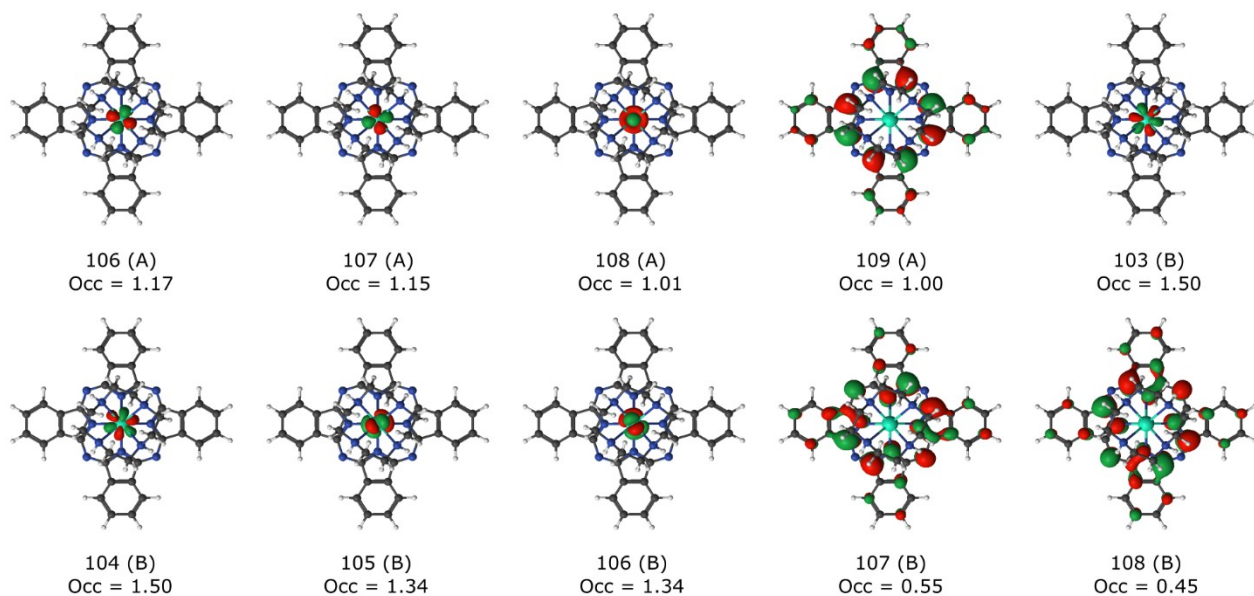

**Figure S11.** Orbital shapes for the doublet 163 of  $[\text{DyPc}(\text{cyclen})]^+$  under  $C_2$  symmetry with basis set 1.

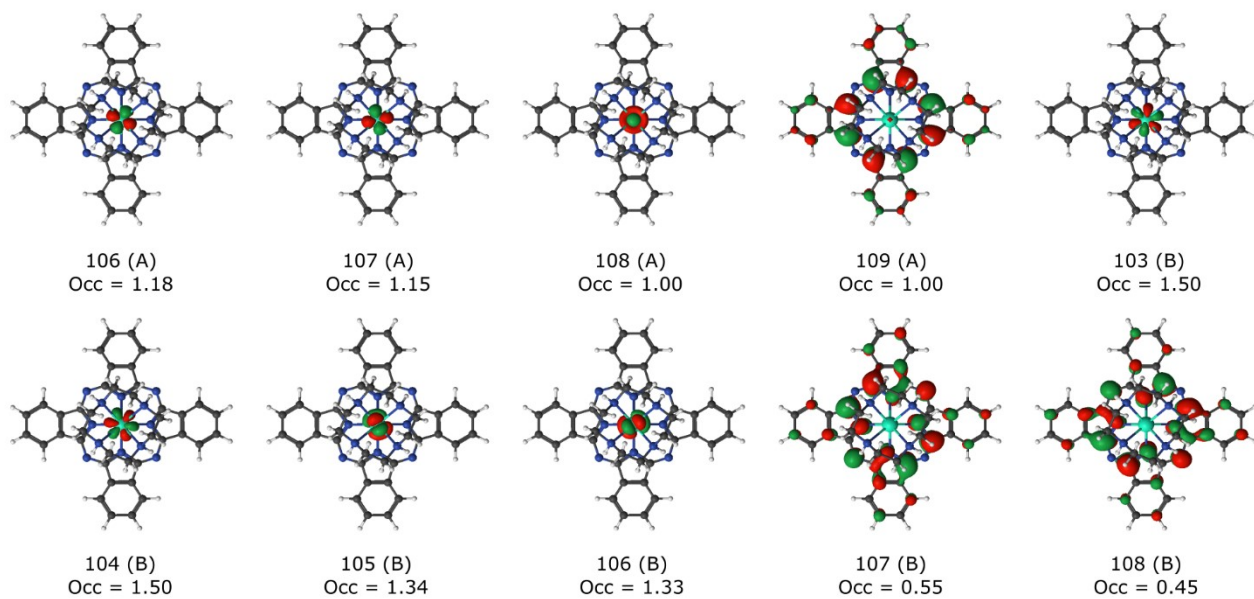

**Figure S12.** Orbital shapes for the doublet 164 of  $[\text{DyPc}(\text{cyclen})]^+$  under  $C_2$  symmetry with basis set 1.

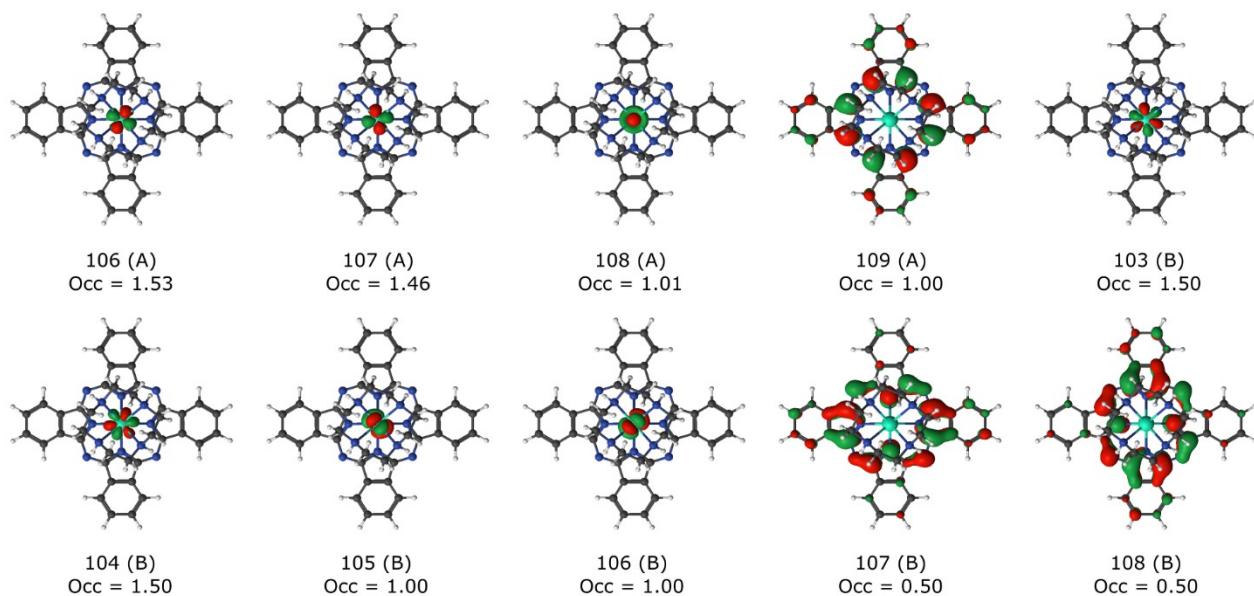

**Figure S13.** Orbital shapes for the doublet 165 of  $[\text{DyPc}(\text{cyclen})]^+$  under  $C_2$  symmetry with basis set 1.

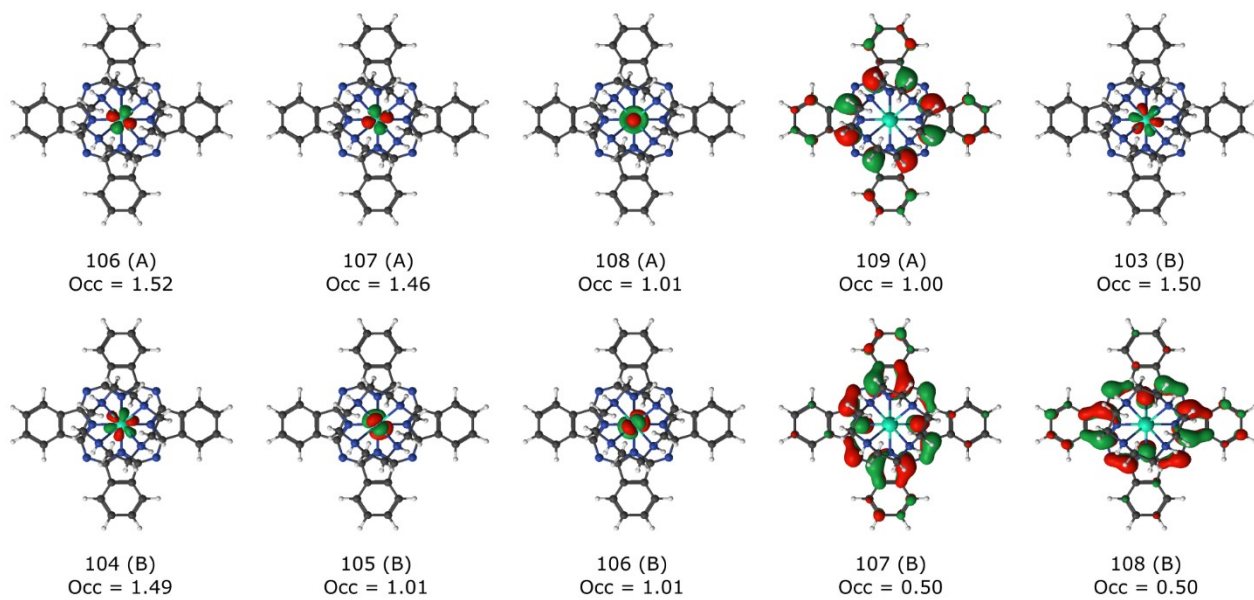

**Figure S14.** Orbital shapes for the doublet 166 of  $[\text{DyPc}(\text{cyclen})]^+$  under  $C_2$  symmetry with basis set 1.

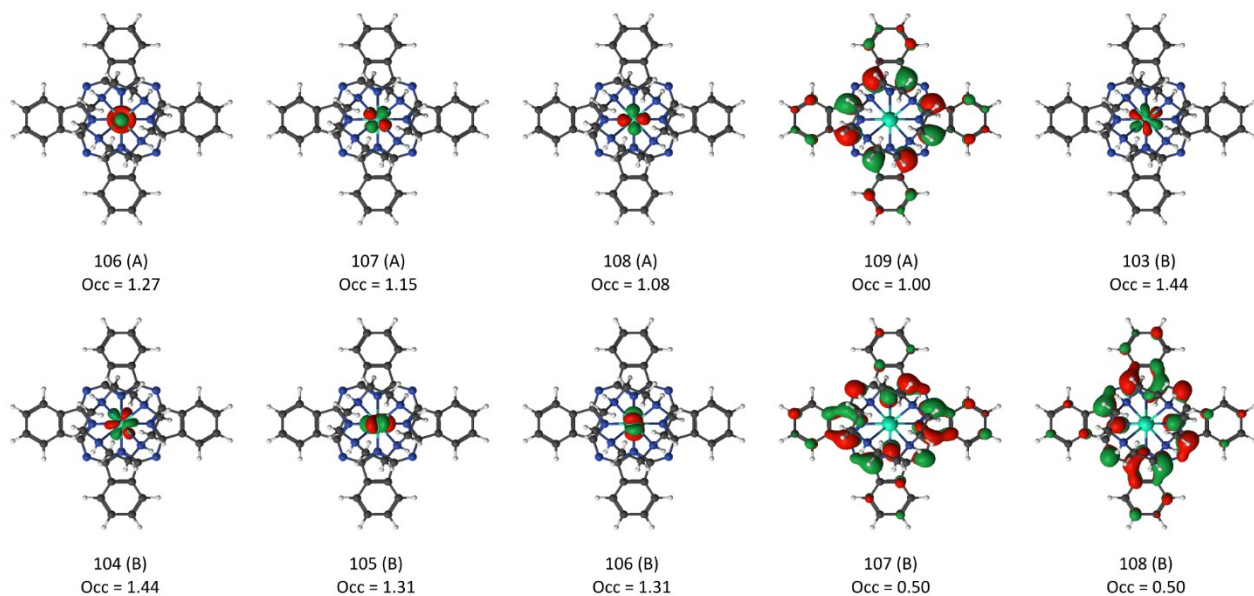

**Figure S15.** Orbital shapes for the doublet 167 of  $[\text{DyPc}(\text{cyclen})]^+$  under  $C_2$  symmetry with basis set 1.

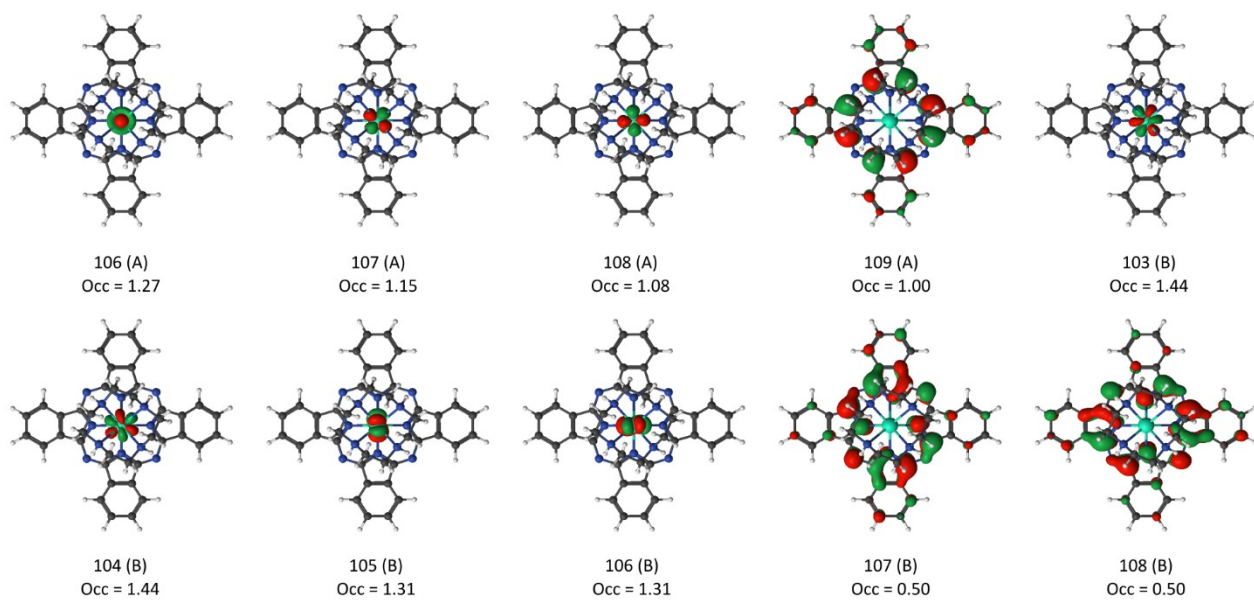

**Figure S16.** Orbital shapes for the doublet 168 of  $[\text{DyPc}(\text{cyclen})]^+$  under  $C_2$  symmetry with basis set 1.

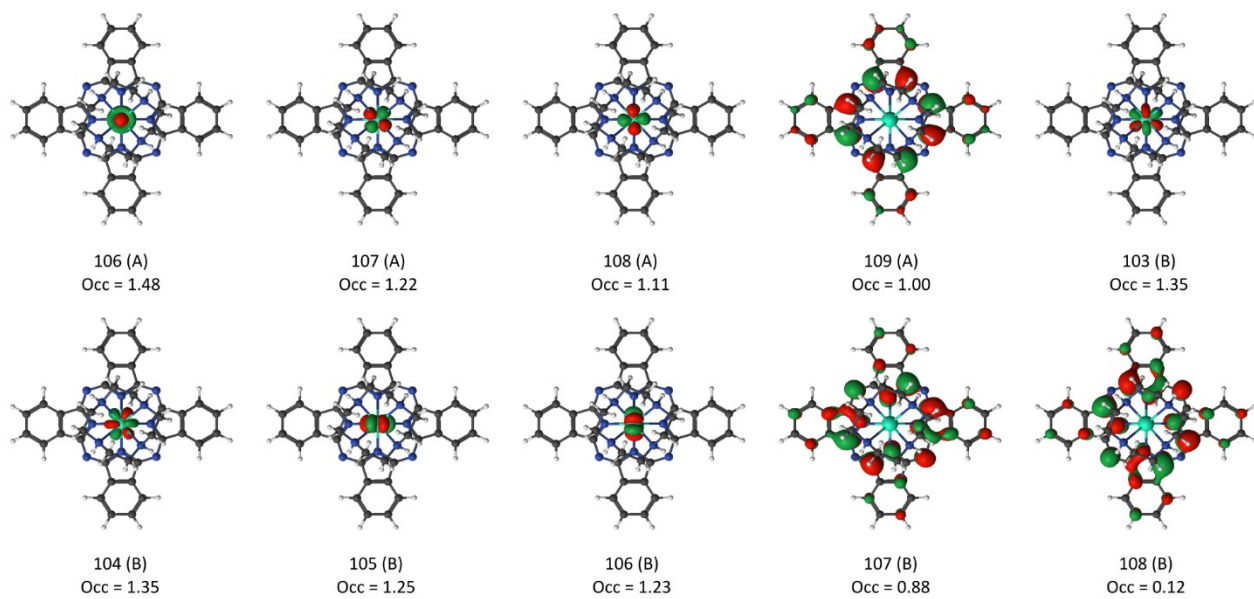

**Figure S17.** Orbital shapes for the doublet 169 of  $[\text{DyPc}(\text{cyclen})]^+$  under  $C_2$  symmetry with basis set 1.

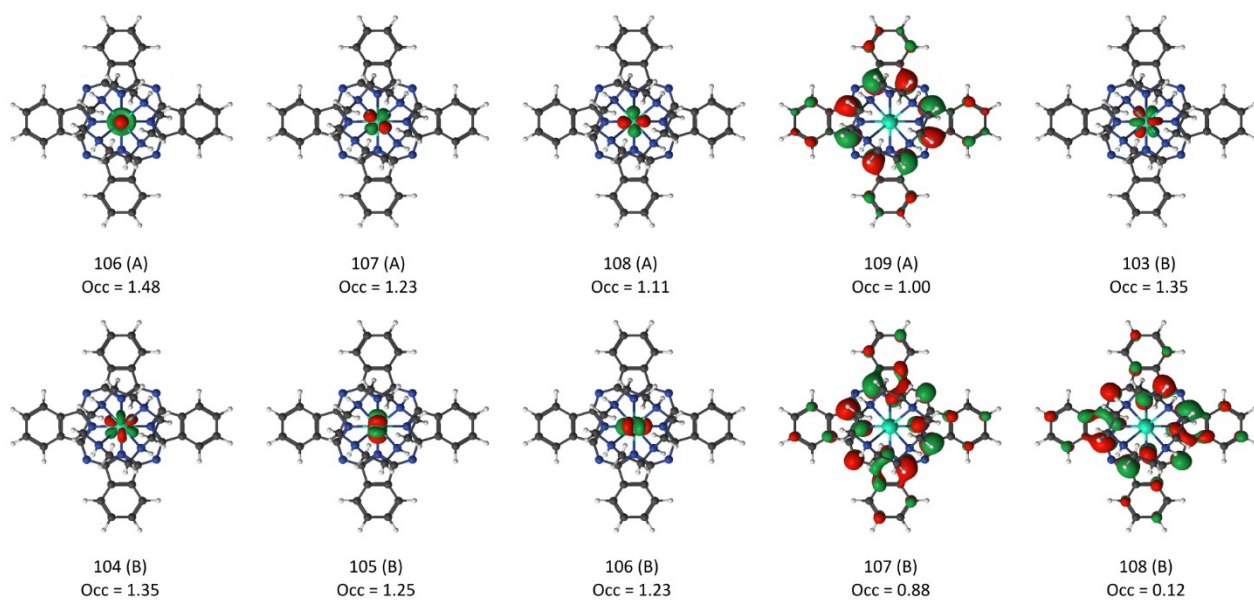

**Figure S18.** Orbital shapes for the doublet 170 of  $[\text{DyPc}(\text{cyclen})]^+$  under  $C_2$  symmetry with basis set 1.

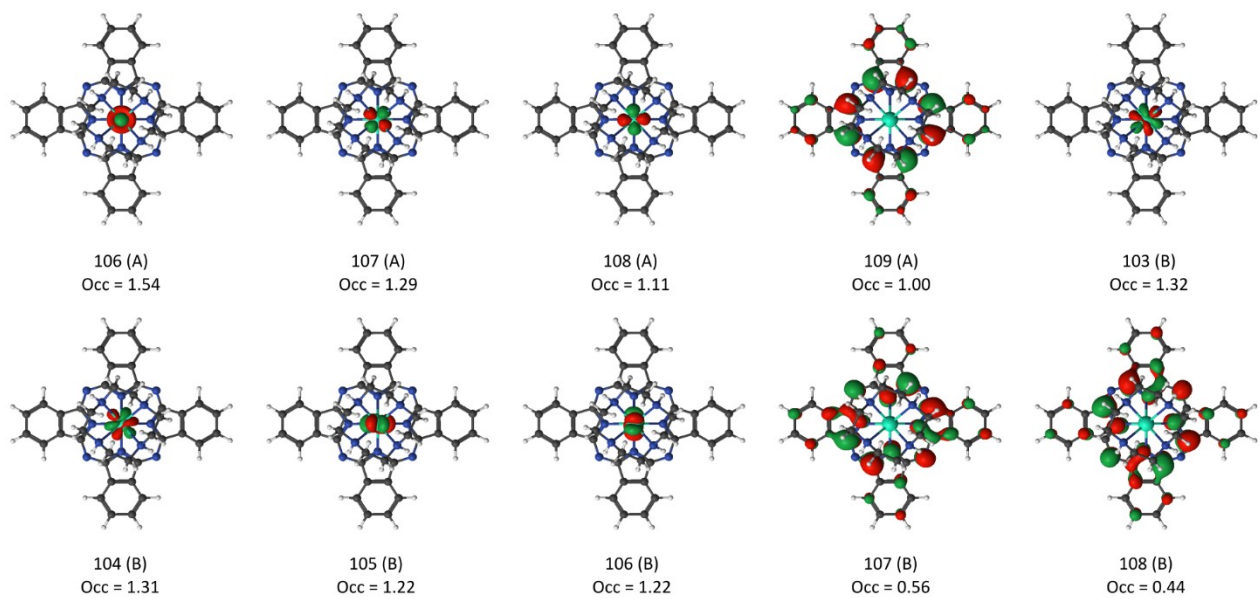

**Figure S19.** Orbital shapes for the doublet 171 of  $[\text{DyPc}(\text{cyclen})]^+$  under  $C_2$  symmetry with basis set 1.

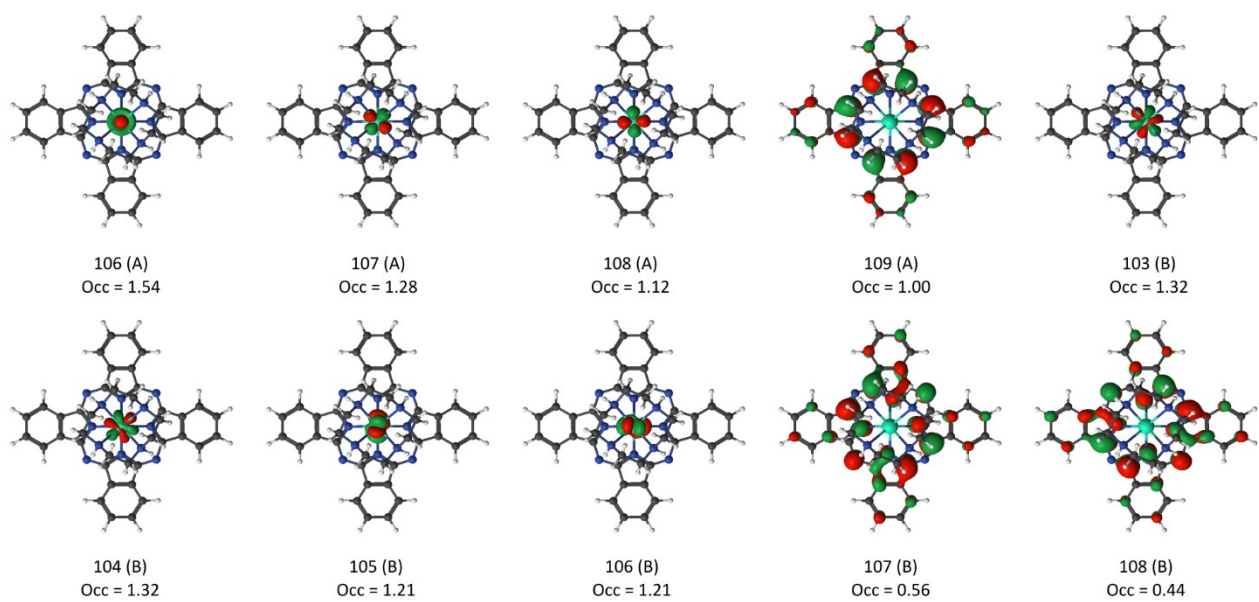

**Figure S20.** Orbital shapes for the doublet 172 of  $[\text{DyPc}(\text{cyclen})]^+$  under  $C_2$  symmetry with basis set 1.

**Table S1.** Parameters determined by the band deconvolution of absorption and MCD spectra of [DyPc(cyclen)]Cl doped in a PMMA film.

|                                                                     | <b>Band1</b> | <b>Band2</b> | <b>Band3</b> | <b>Band4</b> | <b>Band5</b> | <b>Band6</b> | <b>Band7</b> |           |           |           |
|---------------------------------------------------------------------|--------------|--------------|--------------|--------------|--------------|--------------|--------------|-----------|-----------|-----------|
| $E_0$ (cm <sup>-1</sup> ) <sup>a</sup>                              | 14666        | 14857        | 15019        | 15226        | 15515        | 16062        | 16501        |           |           |           |
| $\Gamma$ (cm <sup>-1</sup> ) <sup>a</sup>                           | 298          | 254          | 210          | 170          | 523          | 507          | 506          |           |           |           |
| $\eta$ <sup>a</sup>                                                 | 0.26         | 0.26         | 0.26         | 0.26         | 0.26         | 0.26         | 0.26         |           |           |           |
| $D_0$                                                               | 5.2          | 10           | 3.3          | 0.77         | 4.6          | 2.7          | 4.3          |           |           |           |
| Values obtained by measurements under a fixed magnetic field at 1 T |              |              |              |              |              |              |              |           |           |           |
| $T$ (K)                                                             | $B_0/D_0$    | $A_1/D_0$    | $B_0/D_0$    | $B_0/D_0$    | $B_0/D_0$    | $A_1/D_0$    | $B_0/D_0$    | $B_0/D_0$ | $A_1/D_0$ | $B_0/D_0$ |
| <b>100</b>                                                          | -0.045       | 13           | -0.027       | 0.032        | 0.0046       | 3.0          | 0.010        | -0.0055   | -3.1      | 0.025     |
| <b>1.5</b>                                                          | 0.14         | -60          | -0.025       | 0.0028       | -0.017       | -11          | -0.030       | 0.027     | 12        | -0.079    |
| Values obtained by measurements at 1.5 K                            |              |              |              |              |              |              |              |           |           |           |
| $B$ (T)                                                             | $B_0/D_0$    | $A_1/D_0$    | $B_0/D_0$    | $B_0/D_0$    | $B_0/D_0$    | $A_1/D_0$    | $B_0/D_0$    | $B_0/D_0$ | $A_1/D_0$ | $B_0/D_0$ |
| <b>0.2</b>                                                          | 0.42         | -168         | 0.029        | -0.090       | -0.052       | -31          | -0.096       | 0.069     | 33        | -0.24     |
| <b>0.4</b>                                                          | 0.31         | -128         | 0.030        | -0.062       | -0.038       | -25          | -0.075       | 0.054     | 25        | -0.19     |
| <b>0.6</b>                                                          | 0.26         | -96          | -0.027       | -0.033       | -0.028       | -18          | -0.054       | 0.040     | 19        | -0.14     |
| <b>0.8</b>                                                          | 0.18         | -75          | -0.021       | -0.011       | -0.022       | -14          | -0.040       | 0.032     | 15        | -0.10     |
| <b>2</b>                                                            | 0.056        | -24          | -0.035       | 0.021        | -0.0067      | -4.1         | -0.011       | 0.011     | 4.5       | -0.027    |
| <b>3</b>                                                            | 0.025        | -11          | -0.040       | 0.026        | -0.0030      | -1.6         | -0.0034      | 0.0043    | 1.8       | -0.0087   |
| <b>4</b>                                                            | 0.0077       | -4.1         | -0.040       | 0.030        | -0.00095     | -0.26        | -0.00058     | 0.0018    | 0.60      | 0.00088   |
| <b>5</b>                                                            | -0.0026      | -0.28        | -0.041       | 0.033        | 0.00016      | 0.52         | 0.0019       | -0.00015  | -0.26     | 0.0064    |
| <b>6</b>                                                            | -0.0086      | 2.6          | -0.041       | 0.034        | 0.00092      | 1.0          | 0.0034       | -0.0013   | -0.79     | 0.010     |

a)  $E_0$ ,  $\Gamma$ ,  $\eta$  are the parameters defining the normalized pseudo-Voigt function,

$$f(E) = (1 - \eta)f_G(E;E_0,\gamma_G) + \eta f_L(E;E_0,\gamma_L)$$

where  $f_G(E;E_0,\gamma_G)$  and  $f_L(E;E_0,\gamma_L)$  are the normalized Gaussian and Lorentzian function,

$$f_G(E;E_0,\gamma_G) = \left(\frac{1}{\sqrt{\pi}\gamma_G}\right) \exp\left(-\frac{(E-E_0)^2}{\gamma_G^2}\right)$$

$$f_L(E;E_0,\gamma_L) = \left(\frac{1}{\gamma_L}\right) \left(1 + \frac{(E-E_0)^2}{\gamma_L^2}\right)^{-1}$$

with  $\Gamma = 2\sqrt{\ln 2}\gamma_G = 2\gamma_L$ .

### Details of *ab initio* calculations.

All calculations such as SCF, RASSCF, RASSI and SINGLE\_ANISO were performed on Open Molcas v.22.06 with the employment of two groups of basis sets. The employed basis sets are as follows.

| Basis set 1                           | Basis set 2                           |
|---------------------------------------|---------------------------------------|
| Dy = ANO-RCC...9s8p6d4f3g2h           | Dy = ANO-RCC...8s7p5d3f2g1h           |
| N <sub>close</sub> = ANO-RCC...3s2p1d | N <sub>close</sub> = ANO-RCC...3s2p1d |
| N <sub>distant</sub> = ANO-RCC...2s1p | N <sub>distant</sub> = ANO-RCC...2s1p |
| C <sub>close</sub> = ANO-RCC...2s1p   | C <sub>close</sub> = ANO-RCC...2s1p   |
| C <sub>distant</sub> = ANO-RCC...2s1p | C <sub>distant</sub> = ANO-RCC...2s1p |
| H = ANO-RCC...1s                      | H = ANO-RCC...1s                      |

**Table S2.** Selected dipole transition strengths for [DyPc(cyclen)]<sup>+</sup> as extracted from RASSCF/RASSI/SINGLE\_ANISO calculations, RAS(1,7,2).

| Basis Set 1 |     |                     |                                            |                        |                |                              |
|-------------|-----|---------------------|--------------------------------------------|------------------------|----------------|------------------------------|
| From        | To  | Oscillator Strength | Einstein Coefficients (sec <sup>-1</sup> ) |                        |                | Total A (sec <sup>-1</sup> ) |
|             |     |                     | A <sub>x</sub>                             | A <sub>y</sub>         | A <sub>z</sub> |                              |
| 1           | 333 | 2.50                | 7.63 × 10 <sup>8</sup>                     | 7.61 × 10 <sup>8</sup> | 0.00           | 1.52 × 10 <sup>9</sup>       |
| 2           | 334 | 2.50                | 7.63 × 10 <sup>8</sup>                     | 7.61 × 10 <sup>8</sup> | 0.00           | 1.52 × 10 <sup>9</sup>       |
| 1           | 335 | 2.52                | 7.65 × 10 <sup>8</sup>                     | 7.67 × 10 <sup>8</sup> | 0.00           | 1.53 × 10 <sup>9</sup>       |
| 2           | 336 | 2.52                | 7.65 × 10 <sup>8</sup>                     | 7.67 × 10 <sup>8</sup> | 0.00           | 1.53 × 10 <sup>9</sup>       |
| 3           | 326 | 2.56                | 7.71 × 10 <sup>8</sup>                     | 7.71 × 10 <sup>8</sup> | 0.00           | 1.54 × 10 <sup>9</sup>       |
| 4           | 325 | 2.56                | 7.71 × 10 <sup>8</sup>                     | 7.71 × 10 <sup>8</sup> | 0.00           | 1.54 × 10 <sup>9</sup>       |
| 3           | 328 | 2.58                | 7.76 × 10 <sup>8</sup>                     | 7.76 × 10 <sup>8</sup> | 0.00           | 1.55 × 10 <sup>9</sup>       |
| 4           | 327 | 2.58                | 7.76 × 10 <sup>8</sup>                     | 7.76 × 10 <sup>8</sup> | 0.00           | 1.55 × 10 <sup>9</sup>       |
| 5           | 337 | 2.48                | 7.60 × 10 <sup>8</sup>                     | 7.51 × 10 <sup>8</sup> | 0.00           | 1.51 × 10 <sup>9</sup>       |
| 6           | 338 | 2.48                | 7.60 × 10 <sup>8</sup>                     | 7.51 × 10 <sup>8</sup> | 0.00           | 1.51 × 10 <sup>9</sup>       |
| 5           | 339 | 2.48                | 7.50 × 10 <sup>8</sup>                     | 7.59 × 10 <sup>8</sup> | 0.00           | 1.51 × 10 <sup>9</sup>       |
| 6           | 340 | 2.48                | 7.50 × 10 <sup>8</sup>                     | 7.59 × 10 <sup>8</sup> | 0.00           | 1.51 × 10 <sup>9</sup>       |
| 7           | 342 | 2.06                | 6.48 × 10 <sup>8</sup>                     | 6.48 × 10 <sup>8</sup> | 0.00           | 1.30 × 10 <sup>9</sup>       |
| 8           | 341 | 2.06                | 6.48 × 10 <sup>8</sup>                     | 6.48 × 10 <sup>8</sup> | 0.00           | 1.30 × 10 <sup>9</sup>       |
| 7           | 343 | 2.04                | 6.43 × 10 <sup>8</sup>                     | 6.43 × 10 <sup>8</sup> | 0.00           | 1.29 × 10 <sup>9</sup>       |
| 8           | 344 | 2.04                | 6.43 × 10 <sup>8</sup>                     | 6.43 × 10 <sup>8</sup> | 0.00           | 1.29 × 10 <sup>9</sup>       |
| 9           | 345 | 1.61                | 5.31 × 10 <sup>8</sup>                     | 5.33 × 10 <sup>8</sup> | 0.00           | 1.06 × 10 <sup>9</sup>       |
| 10          | 346 | 1.61                | 5.31 × 10 <sup>8</sup>                     | 5.33 × 10 <sup>8</sup> | 0.00           | 1.06 × 10 <sup>9</sup>       |
| 9           | 347 | 1.60                | 5.30 × 10 <sup>8</sup>                     | 5.28 × 10 <sup>8</sup> | 0.00           | 1.06 × 10 <sup>9</sup>       |
| 10          | 348 | 1.60                | 5.30 × 10 <sup>8</sup>                     | 5.28 × 10 <sup>8</sup> | 0.00           | 1.06 × 10 <sup>9</sup>       |
| 12          | 361 | 0.36                | 1.34 × 10 <sup>8</sup>                     | 1.33 × 10 <sup>8</sup> | 0.00           | 2.67 × 10 <sup>8</sup>       |
| 11          | 362 | 0.36                | 1.34 × 10 <sup>8</sup>                     | 1.33 × 10 <sup>8</sup> | 0.00           | 2.67 × 10 <sup>8</sup>       |
| 12          | 363 | 0.37                | 1.34 × 10 <sup>8</sup>                     | 1.35 × 10 <sup>8</sup> | 0.00           | 2.69 × 10 <sup>8</sup>       |
| 11          | 364 | 0.37                | 1.34 × 10 <sup>8</sup>                     | 1.35 × 10 <sup>8</sup> | 0.00           | 2.69 × 10 <sup>8</sup>       |
| 14          | 369 | 0.83                | 3.33 × 10 <sup>8</sup>                     | 3.35 × 10 <sup>8</sup> | 0.00           | 6.68 × 10 <sup>8</sup>       |
| 13          | 370 | 0.83                | 3.33 × 10 <sup>8</sup>                     | 3.35 × 10 <sup>8</sup> | 0.00           | 6.68 × 10 <sup>8</sup>       |
| 14          | 371 | 0.98                | 3.96 × 10 <sup>8</sup>                     | 3.94 × 10 <sup>8</sup> | 0.00           | 7.90 × 10 <sup>8</sup>       |
| 13          | 372 | 0.98                | 3.96 × 10 <sup>8</sup>                     | 3.94 × 10 <sup>8</sup> | 0.00           | 7.90 × 10 <sup>8</sup>       |
| 15          | 329 | 2.44                | 7.18 × 10 <sup>8</sup>                     | 7.18 × 10 <sup>8</sup> | 0.00           | 1.44 × 10 <sup>9</sup>       |
| 16          | 330 | 2.44                | 7.18 × 10 <sup>8</sup>                     | 7.18 × 10 <sup>8</sup> | 0.00           | 1.44 × 10 <sup>9</sup>       |
| 15          | 331 | 2.43                | 7.14 × 10 <sup>8</sup>                     | 7.14 × 10 <sup>8</sup> | 0.00           | 1.43 × 10 <sup>9</sup>       |



| 16          | 332 | 2.43                | $7.14 \times 10^8$                          | $7.14 \times 10^8$ | 0.00  | $1.43 \times 10^9$               |
|-------------|-----|---------------------|---------------------------------------------|--------------------|-------|----------------------------------|
| Basis Set 2 |     |                     |                                             |                    |       |                                  |
| From        | To  | Oscillator Strength | Einstein Coefficients ( $\text{sec}^{-1}$ ) |                    |       | Total A<br>( $\text{sec}^{-1}$ ) |
|             |     |                     | $A_x$                                       | $A_y$              | $A_z$ |                                  |
| 1           | 333 | 2.52                | $7.72 \times 10^8$                          | $7.74 \times 10^8$ | 0.00  | $1.55 \times 10^9$               |
| 2           | 334 | 2.52                | $7.72 \times 10^8$                          | $7.74 \times 10^8$ | 0.00  | $1.55 \times 10^9$               |
| 1           | 335 | 2.53                | $7.79 \times 10^8$                          | $7.76 \times 10^8$ | 0.00  | $1.55 \times 10^9$               |
| 2           | 336 | 2.53                | $7.79 \times 10^8$                          | $7.76 \times 10^8$ | 0.00  | $1.55 \times 10^9$               |
| 3           | 325 | 2.58                | $7.83 \times 10^8$                          | $7.83 \times 10^8$ | 0.00  | $1.57 \times 10^9$               |
| 4           | 326 | 2.58                | $7.83 \times 10^8$                          | $7.83 \times 10^8$ | 0.00  | $1.57 \times 10^9$               |
| 3           | 328 | 2.59                | $7.88 \times 10^8$                          | $7.88 \times 10^8$ | 0.00  | $1.58 \times 10^9$               |
| 4           | 327 | 2.59                | $7.88 \times 10^8$                          | $7.88 \times 10^8$ | 0.00  | $1.58 \times 10^9$               |
| 5           | 338 | 2.50                | $7.66 \times 10^8$                          | $7.70 \times 10^8$ | 0.00  | $1.54 \times 10^9$               |
| 6           | 337 | 2.50                | $7.66 \times 10^8$                          | $7.70 \times 10^8$ | 0.00  | $1.54 \times 10^9$               |
| 5           | 340 | 2.50                | $7.69 \times 10^8$                          | $7.65 \times 10^8$ | 0.00  | $1.53 \times 10^9$               |
| 6           | 339 | 2.50                | $7.69 \times 10^8$                          | $7.65 \times 10^8$ | 0.00  | $1.53 \times 10^9$               |
| 7           | 341 | 2.07                | $6.57 \times 10^8$                          | $6.57 \times 10^8$ | 0.00  | $1.31 \times 10^9$               |
| 8           | 342 | 2.07                | $6.57 \times 10^8$                          | $6.57 \times 10^8$ | 0.00  | $1.31 \times 10^9$               |
| 7           | 344 | 2.06                | $6.52 \times 10^8$                          | $6.52 \times 10^8$ | 0.00  | $1.30 \times 10^9$               |
| 8           | 343 | 2.06                | $6.52 \times 10^8$                          | $6.52 \times 10^8$ | 0.00  | $1.30 \times 10^9$               |
| 10          | 345 | 1.62                | $5.41 \times 10^8$                          | $5.40 \times 10^8$ | 0.00  | $1.08 \times 10^9$               |
| 9           | 346 | 1.62                | $5.41 \times 10^8$                          | $5.40 \times 10^8$ | 0.00  | $1.08 \times 10^9$               |
| 10          | 347 | 1.61                | $5.37 \times 10^8$                          | $5.38 \times 10^8$ | 0.00  | $1.07 \times 10^9$               |
| 9           | 348 | 1.61                | $5.37 \times 10^8$                          | $5.38 \times 10^8$ | 0.00  | $1.07 \times 10^9$               |
| 11          | 361 | 0.37                | $1.35 \times 10^8$                          | $1.35 \times 10^8$ | 0.00  | $2.69 \times 10^8$               |
| 12          | 362 | 0.37                | $1.35 \times 10^8$                          | $1.35 \times 10^8$ | 0.00  | $2.69 \times 10^8$               |
| 12          | 363 | 0.37                | $1.36 \times 10^8$                          | $1.35 \times 10^8$ | 0.00  | $2.71 \times 10^8$               |
| 11          | 364 | 0.37                | $1.36 \times 10^8$                          | $1.35 \times 10^8$ | 0.00  | $2.71 \times 10^8$               |
| 13          | 369 | 0.84                | $3.41 \times 10^8$                          | $3.41 \times 10^8$ | 0.00  | $6.82 \times 10^8$               |
| 14          | 370 | 0.84                | $3.41 \times 10^8$                          | $3.41 \times 10^8$ | 0.00  | $6.82 \times 10^8$               |
| 13          | 371 | 0.99                | $4.00 \times 10^8$                          | $4.00 \times 10^8$ | 0.00  | $8.01 \times 10^8$               |
| 14          | 372 | 0.99                | $4.00 \times 10^8$                          | $4.00 \times 10^8$ | 0.00  | $8.01 \times 10^8$               |
| 15          | 330 | 2.45                | $7.26 \times 10^8$                          | $7.27 \times 10^8$ | 0.00  | $1.45 \times 10^9$               |
| 16          | 329 | 2.45                | $7.26 \times 10^8$                          | $7.27 \times 10^8$ | 0.00  | $1.45 \times 10^9$               |
| 15          | 331 | 2.44                | $7.23 \times 10^8$                          | $7.23 \times 10^8$ | 0.00  | $1.45 \times 10^9$               |
| 16          | 332 | 2.44                | $7.23 \times 10^8$                          | $7.23 \times 10^8$ | 0.00  | $1.45 \times 10^9$               |

**Table S3.** The calculated transition energy, orbital and spin angular momenta of the ground doublet and the excited doublet SO states for [DyPc(cyclen)]<sup>+</sup>, generated from RAS(1,7,2) calculation with basis set 2.

| Doublet | Spin-orbit State | Energy (cm <sup>-1</sup> ) | Oscillator Strength<br>(initial doublet →<br>final doublet) | L <sub>z</sub> | S <sub>z</sub> | $\frac{ J_z }{ L_z+S_z }$ | Change in<br> J <sub>z</sub>   from<br>the initial<br>doublet | Primal<br> J <sub>z</sub> ⟩ | Δ <sub>JL</sub> |
|---------|------------------|----------------------------|-------------------------------------------------------------|----------------|----------------|---------------------------|---------------------------------------------------------------|-----------------------------|-----------------|
| 1       | 1, 2             | 0.000                      |                                                             | 3.62           | 1.83           | 5.45                      |                                                               | ± 11/2⟩                     |                 |
| 2       | 3, 4             | 29.452                     |                                                             | 4.22           | 2.23           | 6.45                      |                                                               | ± 13/2⟩                     |                 |
| 3       | 5, 6             | 74.986                     |                                                             | 2.79           | 1.33           | 4.12                      |                                                               | ± 9/2⟩                      |                 |
| 4       | 7, 8             | 142.043                    |                                                             | 1.88           | 0.90           | 2.78                      |                                                               | ± 7/2⟩                      |                 |
| 8       | 15, 16           | 416.164                    |                                                             | 4.94           | 2.48           | 7.42                      |                                                               | ± 15/2⟩                     |                 |
| 163     | 325, 326         | 30197.769                  | 2.56 (2→163)                                                | 2.18           | 2.17           | 4.35                      | -2.10                                                         |                             | -6.56           |
| 164     | 327, 328         | 30210.877                  | 2.56 (2→164)                                                | 6.43           | 2.17           | 8.60                      | 2.15                                                          |                             |                 |
| 165     | 329, 330         | 30242.648                  | 2.44 (8→165)                                                | 7.03           | 2.47           | 9.50                      | 2.08                                                          |                             | 5.14            |
| 166     | 331, 332         | 30252.926                  | 2.43 (8→166)                                                | 2.79           | 2.46           | 5.25                      | -2.17                                                         |                             |                 |
| 167     | 333, 334         | 30331.760                  | 2.50 (1→167)                                                | 1.54           | 1.75           | 3.29                      | -2.16                                                         |                             | -1.55           |
| 168     | 335, 336         | 30334.863                  | 2.52 (1→168)                                                | 5.65           | 1.77           | 7.42                      | 1.97                                                          |                             |                 |
| 169     | 337, 338         | 30398.958                  | 2.48 (3→169)                                                | 4.89           | 1.42           | 6.31                      | 2.19                                                          |                             | 0.65            |
| 170     | 339, 340         | 30400.252                  | 2.48 (3→170)                                                | 0.83           | 1.39           | 2.22                      | -1.90                                                         |                             |                 |
| 171     | 341, 342         | 30980.705                  | 2.06 (4→171)                                                | 0.55           | 0.69           | 1.24                      | -1.54                                                         |                             | -3.43           |
| 172     | 343, 344         | 30987.569                  | 2.04 (4→172)                                                | 4.71           | 0.71           | 5.42                      | 2.64                                                          |                             |                 |
