# Supplementary material for: Antiparallel alignment of the two angular momenta in a photoexcited dysprosium–phthalocyanine complex
Source: Royal Society of Chemistry journal article supplement (doi:10.1039/d2qi01925f), 2022-12-03
Supplement: d2qi01925f2.pdf [file d2qi01925f2.pdf]

89

Angstrom From PcYcyclen+ complex with B3LYP/6-31G\*\*+LANL2DZ

|   |               |               |               |
|---|---------------|---------------|---------------|
| Y | 0.            | 0.            | -0.1012410355 |
| N | 2.0047938757  | 0.0035216883  | -1.3064411541 |
| N | -0.0035216883 | 2.0047938757  | -1.3064411541 |
| N | -2.0047938757 | -0.0035216883 | -1.3064411541 |
| N | 0.0035216883  | -2.0047938757 | -1.3064411541 |
| N | 2.3948134861  | -2.3845585263 | -1.4847077145 |
| N | 2.3845585263  | 2.3948134861  | -1.4847077145 |
| N | -2.3948134861 | 2.3845585263  | -1.4847077145 |
| N | -2.3845585263 | -2.3948134861 | -1.4847077145 |
| C | 2.7894772202  | -1.1100837787 | -1.4692345062 |
| C | 1.1100837787  | 2.7894772202  | -1.4692345062 |
| C | -2.7894772202 | 1.1100837787  | -1.4692345062 |
| C | -1.1100837787 | -2.7894772202 | -1.4692345062 |
| C | 2.783433819   | 1.1219575459  | -1.4707254465 |
| C | -1.1219575459 | 2.783433819   | -1.4707254465 |
| C | -2.783433819  | -1.1219575459 | -1.4707254465 |
| C | 1.1219575459  | -2.783433819  | -1.4707254465 |
| C | 4.174542792   | -0.6963997546 | -1.6695325841 |
| C | 4.1705774828  | 0.7150013774  | -1.6704806584 |
| C | 0.7150013774  | -4.1705774828 | -1.6704806584 |
| C | -0.6963997546 | -4.174542792  | -1.6695325841 |
| C | 0.6963997546  | 4.174542792   | -1.6695325841 |
| C | -0.7150013774 | 4.1705774828  | -1.6704806584 |
| C | -4.1705774828 | -0.7150013774 | -1.6704806584 |
| C | -4.174542792  | 0.6963997546  | -1.6695325841 |
| C | 5.352860254   | -1.4162096029 | -1.8717731927 |
| C | 5.3449535836  | 1.4411687308  | -1.8736023871 |

|   |               |               |               |
|---|---------------|---------------|---------------|
| C | 1.4162096029  | 5.352860254   | -1.8717731927 |
| C | -1.4411687308 | 5.3449535836  | -1.8736023871 |
| C | -5.352860254  | 1.4162096029  | -1.8717731927 |
| C | -5.3449535836 | -1.4411687308 | -1.8736023871 |
| C | -1.4162096029 | -5.352860254  | -1.8717731927 |
| C | 1.4411687308  | -5.3449535836 | -1.8736023871 |
| C | 6.5296056343  | -0.6889591311 | -2.0573337567 |
| C | 6.5257109989  | 0.7203156069  | -2.0582142156 |
| C | 0.6889591311  | 6.5296056343  | -2.0573337567 |
| C | -0.7203156069 | 6.5257109989  | -2.0582142156 |
| C | -6.5296056343 | 0.6889591311  | -2.0573337567 |
| C | -6.5257109989 | -0.7203156069 | -2.0582142156 |
| C | -0.6889591311 | -6.5296056343 | -2.0573337567 |
| C | 0.7203156069  | -6.5257109989 | -2.0582142156 |
| H | 5.343558561   | -2.5011676034 | -1.8865527959 |
| H | 5.3294301371  | 2.5260271866  | -1.8895107679 |
| H | 2.5011676034  | 5.343558561   | -1.8865527959 |
| H | -2.5260271866 | 5.3294301371  | -1.8895107679 |
| H | -5.343558561  | 2.5011676034  | -1.8865527959 |
| H | -5.3294301371 | -2.5260271866 | -1.8895107679 |
| H | -2.5011676034 | -5.343558561  | -1.8865527959 |
| H | 2.5260271866  | -5.3294301371 | -1.8895107679 |
| H | 7.4668186574  | -1.214989475  | -2.2115699659 |
| H | 7.4600247815  | 1.2513269154  | -2.2129515318 |
| H | 1.214989475   | 7.4668186574  | -2.2115699659 |
| H | -1.2513269154 | 7.4600247815  | -2.2129515318 |
| H | -7.4668186574 | 1.214989475   | -2.2115699659 |
| H | -7.4600247815 | -1.2513269154 | -2.2129515318 |
| H | -1.214989475  | -7.4668186574 | -2.2115699659 |

|   |               |               |               |
|---|---------------|---------------|---------------|
| H | 1.2513269154  | -7.4600247815 | -2.2129515318 |
| N | 1.3438575652  | -1.5547916018 | 1.4462589652  |
| N | 1.5547916018  | 1.3438575652  | 1.4462589652  |
| N | -1.3438575652 | 1.5547916018  | 1.4462589652  |
| N | -1.5547916018 | -1.3438575652 | 1.4462589652  |
| C | 2.0759360367  | -0.8280145675 | 2.5025256848  |
| C | 2.6430820436  | 0.4778518105  | 1.950556063   |
| C | 0.8280145675  | 2.0759360367  | 2.5025256848  |
| C | -0.4778518105 | 2.6430820436  | 1.950556063   |
| C | -2.0759360367 | 0.8280145675  | 2.5025256848  |
| C | -2.6430820436 | -0.4778518105 | 1.950556063   |
| C | -0.8280145675 | -2.0759360367 | 2.5025256848  |
| C | 0.4778518105  | -2.6430820436 | 1.950556063   |
| H | 2.8865110629  | -1.4375248777 | 2.9253441531  |
| H | 1.4375248777  | 2.8865110629  | 2.9253441531  |
| H | -1.4375248777 | -2.8865110629 | 2.9253441531  |
| H | -2.8865110629 | 1.4375248777  | 2.9253441531  |
| H | 1.3796122433  | -0.6146150161 | 3.3194498466  |
| H | 0.6146150161  | 1.3796122433  | 3.3194498466  |
| H | -0.6146150161 | -1.3796122433 | 3.3194498466  |
| H | -1.3796122433 | 0.6146150161  | 3.3194498466  |
| H | 3.3078975169  | 0.2639677705  | 1.1077795593  |
| H | -0.2639677705 | 3.3078975169  | 1.1077795593  |
| H | -3.3078975169 | -0.2639677705 | 1.1077795593  |
| H | 0.2639677705  | -3.3078975169 | 1.1077795593  |
| H | 3.2352791925  | 0.9800891828  | 2.7286498736  |
| H | -0.9800891828 | 3.2352791925  | 2.7286498736  |
| H | -3.2352791925 | -0.9800891828 | 2.7286498736  |
| H | 0.9800891828  | -3.2352791925 | 2.7286498736  |

|   |               |               |              |
|---|---------------|---------------|--------------|
| H | 2.0291058279  | -1.9670375294 | 0.8160641215 |
| H | 1.9670375294  | 2.0291058279  | 0.8160641215 |
| H | -1.9670375294 | -2.0291058279 | 0.8160641215 |
| H | -2.0291058279 | 1.9670375294  | 0.8160641215 |
